# Supplementary material for: Enhanced selectivity in the conversion of glycerol to pyridine bases over HZSM-5/11 intergrowth zeolite
Source: Royal Society of Chemistry journal article supplement (doi:10.1039/c7ra02311a), 2017-01-01
Supplement: c7ra02311a1.pdf [file c7ra02311a1.pdf]

Fig. S1 XRF

| Component | result | detection limit | element | intensity | w/o normal |         |
|-----------|--------|-----------------|---------|-----------|------------|---------|
| 1         | Na2O   | 1.30 mass%      | 0.00767 | Na-KA     | 3.5396     | 0.6573  |
| 2         | Al2O3  | 2.11 mass%      | 0.00382 | Al-KA     | 30.4080    | 1.0726  |
| 3         | SiO2   | 96.4 mass%      | 0.01045 | Si-KA     | 1152.2334  | 48.9230 |
| 4         | SO3    | 0.103 mass%     | 0.00290 | S -KA     | 1.2949     | 0.0520  |
| 5         | CaO    | 0.0384 mass%    | 0.00264 | Ca-KA     | 0.9451     | 0.0195  |
| 6         | Fe2O3  | 0.0206 mass%    | 0.00288 | Fe-KA     | 1.0907     | 0.0105  |
| 7         | NiO    | 0.0052 mass%    | 0.00182 | Ni-KA     | 0.6052     | 0.0026  |
| 8         | ZnO    | 0.0037 mass%    | 0.00138 | Zn-KA     | 0.7734     | 0.0019  |

Fig. S2 N<sub>2</sub> adsorption/desorption

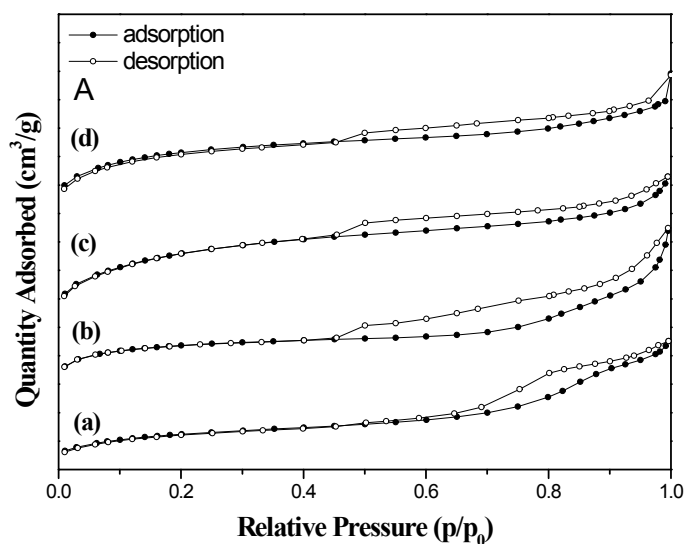

(a) ZSM-5(80) ; (b) ZSM-11(80) ; (c) ZSM-5/11(78) ; (d) ZSM-5(80)/ZSM-11(80)

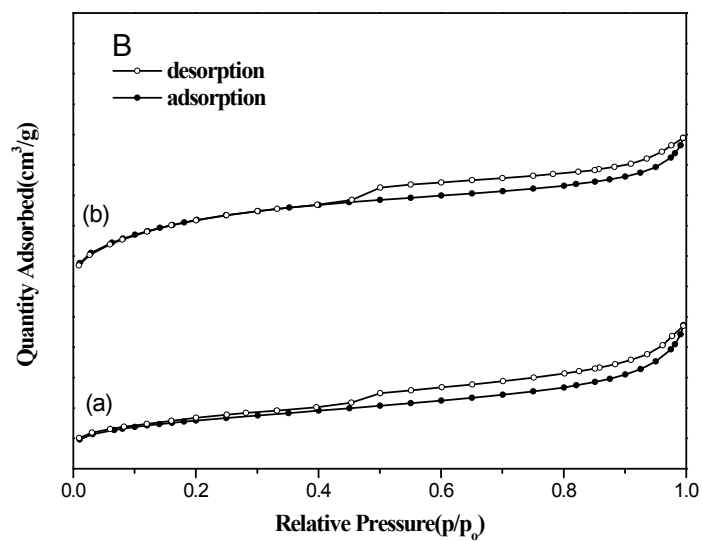

(a) HZSM-5/11(78)(used); (b) HZSM-5/11(78)(fresh)

Fig. S3 NH<sub>3</sub>-TPD

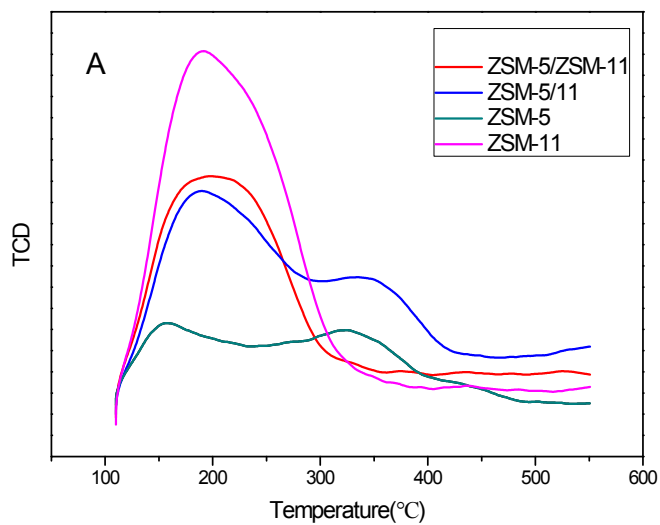

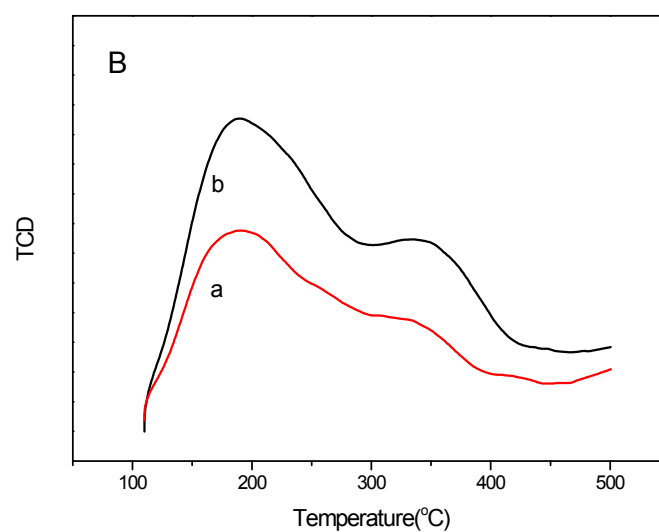

(a) HZSM-5/11(78)(used) ; (b) HZSM-5/11(78)(fresh)

Fig. S4 GC-MS analysis results

Compound report 1

| 化合物表                                       |       |                                    |         |         |         |          |
|--------------------------------------------|-------|------------------------------------|---------|---------|---------|----------|
| 化合物标签                                      | 保留时间  | 名称                                 | 分子式     | MFG 分子式 | DB 分子式  | 匹配数 (DB) |
| Cpd 1: Oxygen                              | 0.106 | Oxygen                             | O2      | O2      | O2      | 3        |
| Cpd 2: Oxygen                              | 0.456 | Oxygen                             | O2      | O2      | O2      | 2        |
| Cpd 3: Carbon dioxide                      | 2.106 | Carbon dioxide                     | CO2     | CO2     | CO2     | 10       |
| Cpd 4: Acetaldehyde                        | 2.196 | Acetaldehyde                       | C2H4O   | C2H4O   | C2H4O   | 10       |
| Cpd 5: Acetonitrile                        | 2.371 | Acetonitrile                       | C2H3N   | C2H3N   | C2H3N   | 10       |
| Cpd 6: 2-Propen-1-ol                       | 2.553 | 2-Propen-1-ol                      | C3H6O   | C3H6O   | C3H6O   | 10       |
| Cpd 7: Diaziridine, 3,3-dimethyl-          | 2.613 | Diaziridine, 3,3-dimethyl-         | C3H8N2  | C3H8N2  | C3H8N2  | 10       |
| Cpd 8: Propanenitrile                      | 2.71  | Propanenitrile                     | C3H5N   | C3H5N   | C3H5N   | 10       |
| Cpd 9: 2-Butanone                          | 2.813 | 2-Butanone                         | C4H8O   | C4H8O   | C4H8O   | 10       |
| Cpd 10: Isobutyronitrile                   | 3.018 | Isobutyronitrile                   | C4H7N   | C4H7N   | C4H7N   | 10       |
| Cpd 11: Benzene                            | 3.381 | Benzene                            | C6H6    | C6H6    | C6H6    | 10       |
| Cpd 12: Acetic acid, hydrazide             | 3.483 | Acetic acid, hydrazide             | C2H6N2O | C2H6N2O | C2H6N2O | 9        |
| Cpd 13: Pyridine                           | 4.571 | Pyridine                           | C5H5N   | C5H5N   | C5H5N   | 10       |
| Cpd 14: Pyridine                           | 4.8   | Pyridine                           | C5H5N   | C5H5N   | C5H5N   | 10       |
| Cpd 15: Boron, trihydro(pyridine)-, (T-4)- | 5.078 | Boron, trihydro(pyridine)-, (T-4)- | C5H8BN  | C5H8BN  | C5H8BN  | 10       |
| Cpd 16: Pyridine                           | 5.278 | Pyridine                           | C5H5N   | C5H5N   | C5H5N   | 10       |
| Cpd 17: Oxygen                             | 5.846 | Oxygen                             | O2      | O2      | O2      | 1        |
| Cpd 18: Pyridine, 2-methyl-                | 6.359 | Pyridine, 2-methyl-                | C6H7N   | C6H7N   | C6H7N   | 10       |
| Cpd 19: 3-Aminopyridine                    | 6.619 | 3-Aminopyridine                    | C5H6N2  | C5H6N2  | C5H6N2  | 10       |

|                                   |        |                           |        |        |        |    |
|-----------------------------------|--------|---------------------------|--------|--------|--------|----|
| Cpd 20: 1H-Pyrrole, 2-methyl-     | 7.163  | 1H-Pyrrole, 2-methyl-     | C5H7N  | C5H7N  | C5H7N  | 10 |
| Cpd 21: 1H-Pyrrole, 2-methyl-     | 7.501  | 1H-Pyrrole, 2-methyl-     | C5H7N  | C5H7N  | C5H7N  | 10 |
| Cpd 22: Pyridine, 3-methyl-       | 7.864  | Pyridine, 3-methyl-       | C6H7N  | C6H7N  | C6H7N  | 10 |
| Cpd 23: Pyridine, 3-methyl-       | 8.262  | Pyridine, 3-methyl-       | C6H7N  | C6H7N  | C6H7N  | 10 |
| Cpd 24: Pyridine, 2,6-dimethyl-   | 9.145  | Pyridine, 2,6-dimethyl-   | C7H9N  | C7H9N  | C7H9N  | 10 |
| Cpd 25: Pyridine, 2-ethyl-        | 9.894  | Pyridine, 2-ethyl-        | C7H9N  | C7H9N  | C7H9N  | 10 |
| Cpd 26: Pyrazine, 2,5-dimethyl-   | 10.111 | Pyrazine, 2,5-dimethyl-   | C6H8N2 | C6H8N2 | C6H8N2 | 10 |
| Cpd 27: Pyrimidine, 4,6-dimethyl- | 10.172 | Pyrimidine, 4,6-dimethyl- | C6H8N2 | C6H8N2 | C6H8N2 | 10 |

|                                                                                      |        |                                                                              |           |           |           |    |
|--------------------------------------------------------------------------------------|--------|------------------------------------------------------------------------------|-----------|-----------|-----------|----|
| Cpd 28: 1H-Pyrrole, 2,5-dimethyl-                                                    | 10.812 | 1H-Pyrrole, 2,5-dimethyl-                                                    | C6H9N     | C6H9N     | C6H9N     | 10 |
| Cpd 29: Pyridine, 2,5-dimethyl-                                                      | 11.199 | Pyridine, 2,5-dimethyl-                                                      | C7H9N     | C7H9N     | C7H9N     | 10 |
| Cpd 30: Pyridine, 2,3-dimethyl-                                                      | 11.876 | Pyridine, 2,3-dimethyl-                                                      | C7H9N     | C7H9N     | C7H9N     | 10 |
| Cpd 31: Oxygen                                                                       | 12.407 | Oxygen                                                                       | O2        | O2        | O2        | 3  |
| Cpd 32: Pyridine, 3-ethyl-                                                           | 12.588 | Pyridine, 3-ethyl-                                                           | C7H9N     | C7H9N     | C7H9N     | 10 |
| Cpd 33: Oxygen                                                                       | 13.12  | Oxygen                                                                       | O2        | O2        | O2        | 1  |
| Cpd 34: Pyridine, 2-pentyl-                                                          | 13.537 | Pyridine, 2-pentyl-                                                          | C10H15N   | C10H15N   | C10H15N   | 10 |
| Cpd 35: Pyridine, 2,6-dimethyl-                                                      | 13.912 | Pyridine, 2,6-dimethyl-                                                      | C7H9N     | C7H9N     | C7H9N     | 7  |
| Cpd 36: Pyridine, 2-aminomethyl-6-methyl-                                            | 14.854 | Pyridine, 2-aminomethyl-6-methyl-                                            | C7H10N2   | C7H10N2   | C7H10N2   | 10 |
| Cpd 37: Pyridine, 2-aminomethyl-6-methyl-                                            | 15.023 | Pyridine, 2-aminomethyl-6-methyl-                                            | C7H10N2   | C7H10N2   | C7H10N2   | 10 |
| Cpd 38: 4-Pyridinamine, 2,6-dimethyl-                                                | 15.15  | 4-Pyridinamine, 2,6-dimethyl-                                                | C7H10N2   | C7H10N2   | C7H10N2   | 10 |
| Cpd 39: Oxygen                                                                       | 15.398 | Oxygen                                                                       | O2        | O2        | O2        | 10 |
| Cpd 40: Oxygen                                                                       | 16.147 | Oxygen                                                                       | O2        | O2        | O2        | 1  |
| Cpd 41: Oxygen                                                                       | 17.253 | Oxygen                                                                       | O2        | O2        | O2        | 1  |
| Cpd 42: Carbamic acid, N-phenyl-, 2-methylphenyl ester                               | 17.948 | Carbamic acid, N-phenyl-, 2-methylphenyl ester                               | C14H13NO2 | C14H13NO2 | C14H13NO2 | 10 |
| Cpd 43: Benzenamine, 3-methyl-                                                       | 18.455 | Benzenamine, 3-methyl-                                                       | C7H9N     | C7H9N     | C7H9N     | 10 |
| Cpd 44: Benzenamine, 3-methyl-                                                       | 18.63  | Benzenamine, 3-methyl-                                                       | C7H9N     | C7H9N     | C7H9N     | 10 |
| Cpd 45: 5H-1-Pyridine, 6,7-dihydro-                                                  | 19.555 | 5H-1-Pyridine, 6,7-dihydro-                                                  | C8H9N     | C8H9N     | C8H9N     | 10 |
| Cpd 46: 5-Allyl-4-[1-(p-aminophenyl)ethylidenehydrazono]-6-methyl-2-phenylpyrimidine | 19.821 | 5-Allyl-4-[1-(p-aminophenyl)ethylidenehydrazono]-6-methyl-2-phenylpyrimidine | C22H23N5  | C22H23N5  | C22H23N5  | 10 |

|                                                                                                              |        |                                                                                                      |             |             |             |    |
|--------------------------------------------------------------------------------------------------------------|--------|------------------------------------------------------------------------------------------------------|-------------|-------------|-------------|----|
| Cpd 47: Pyridine, 2-methyl-5-(1-methylethenyl)-                                                              | 19.972 | Pyridine, 2-methyl-5-(1-methylethenyl)-                                                              | C9H11N      | C9H11N      | C9H11N      | 10 |
| Cpd 48: 10-Hydroxytricyclo[4.2.1.1(2,5)]dec-3-en-9-one                                                       | 20.056 | 10-Hydroxytricyclo[4.2.1.1(2,5)]dec-3-en-9-one                                                       | C10H12O2    | C10H12O2    | C10H12O2    | 10 |
| Cpd 49: 2(1H)-Naphthalenone, 4a,5,8,8a-tetrahydro-1,1,4a-trimethyl-, trans-                                  | 20.389 | 2(1H)-Naphthalenone, 4a,5,8,8a-tetrahydro-1,1,4a-trimethyl-, trans-                                  | C13H18O     | C13H18O     | C13H18O     | 10 |
| Cpd 50: 2H-1b,4-Ethanopentaleno[1,2-b]oxirene, hexahydro-, (1a.alpha.,1b.beta.,4.beta.,4a.alpha.,5a.alpha.)- | 20.528 | 2H-1b,4-Ethanopentaleno[1,2-b]oxirene, hexahydro-, (1a.alpha.,1b.beta.,4.beta.,4a.alpha.,5a.alpha.)- | C10H14O     | C10H14O     | C10H14O     | 10 |
| Cpd 51: Tetracyclo[4.4.1.1(7,10).0(2,5)]dodec-3-en-11-ol                                                     | 20.697 | Tetracyclo[4.4.1.1(7,10).0(2,5)]dodec-3-en-11-ol                                                     | C12H16O     | C12H16O     | C12H16O     | 10 |
| Cpd 52: 1,2-Epoxy-5,9-cyclododecadiene                                                                       | 20.896 | 1,2-Epoxy-5,9-cyclododecadiene                                                                       | C12H18O     | C12H18O     | C12H18O     | 10 |
| Cpd 53: Quinoline                                                                                            | 21.434 | Quinoline                                                                                            | C9H7N       | C9H7N       | C9H7N       | 10 |
| Cpd 54: Paromomycin                                                                                          | 21.712 | Paromomycin                                                                                          | C23H45N5O14 | C23H45N5O14 | C23H45N5O14 | 10 |
| Cpd 55: Paromomycin                                                                                          | 21.899 | Paromomycin                                                                                          | C23H45N5O14 | C23H45N5O14 | C23H45N5O14 | 10 |
| Cpd 56: m-Aminophenylacetylene                                                                               | 22.032 | m-Aminophenylacetylene                                                                               | C8H7N       | C8H7N       | C8H7N       | 10 |
| Cpd 57: 1,5-Diphenyl-1,5-hexadiene                                                                           | 22.189 | 1,5-Diphenyl-1,5-hexadiene                                                                           | C18H18      | C18H18      | C18H18      | 10 |
| Cpd 58: 2,5-Octadecadiynoic acid, methyl ester                                                               | 22.25  | 2,5-Octadecadiynoic acid, methyl ester                                                               | C19H30O2    | C19H30O2    | C19H30O2    | 10 |
| Cpd 59: Acetamide, N-methyl-N-[4-(3-hydroxypyrrolidinyl)-2-butynyl]-                                         | 22.376 | Acetamide, N-methyl-N-[4-(3-hydroxypyrrolidinyl)-2-butynyl]-                                         | C11H18N2O2  | C11H18N2O2  | C11H18N2O2  | 10 |

Reaction conditions: reaction temperature, 520 °C; molar ratio of NH<sub>3</sub> to glycerol, 12:1; GHSV, 3200 h<sup>-1</sup>; glycerol concentration, 20%.

## Compound report 2

| 化合物标签                                      | 保留时间  | 名称                                 | 分子式     | MFG 分子式 | DB 分子式  | 匹配数 (DB) |
|--------------------------------------------|-------|------------------------------------|---------|---------|---------|----------|
| Cpd 1: Carbon dioxide                      | 2.1   | Carbon dioxide                     | CO2     | CO2     | CO2     | 20       |
| Cpd 2: Acetaldehyde                        | 2.19  | Acetaldehyde                       | C2H4O   | C2H4O   | C2H4O   | 20       |
| Cpd 3: Ethanamine, N-methylene-            | 2.323 | Ethanamine, N-methylene-           | C3H7N   | C3H7N   | C3H7N   | 20       |
| Cpd 4: 1-Propene, 3-propoxy-               | 2.371 | 1-Propene, 3-propoxy-              | C6H12O  | C6H12O  | C6H12O  | 20       |
| Cpd 5: 2-Propen-1-ol                       | 2.547 | 2-Propen-1-ol                      | C3H6O   | C3H6O   | C3H6O   | 20       |
| Cpd 6: Propanenitrile                      | 2.704 | Propanenitrile                     | C3H5N   | C3H5N   | C3H5N   | 20       |
| Cpd 7: 2-Butanone                          | 2.806 | 2-Butanone                         | C4H8O   | C4H8O   | C4H8O   | 20       |
| Cpd 8: Pyrazine                            | 4.389 | Pyrazine                           | C4H4N2  | C4H4N2  | C4H4N2  | 20       |
| Cpd 9: Pyridine                            | 4.619 | Pyridine                           | C5H5N   | C5H5N   | C5H5N   | 20       |
| Cpd 10: 3-(2-Propenyl)cyclopentene         | 4.806 | 3-(2-Propenyl)cyclopentene         | C8H12   | C8H12   | C8H12   | 20       |
| Cpd 11: Boron, trihydro(pyridine)-, (T-4)- | 5.078 | Boron, trihydro(pyridine)-, (T-4)- | C5H8BN  | C5H8BN  | C5H8BN  | 20       |
| Cpd 12: Trimethylsilyl cyanide             | 5.241 | Trimethylsilyl cyanide             | C4H9NSi | C4H9NSi | C4H9NSi | 20       |
| Cpd 13: Pyridine, 2-methyl-                | 6.347 | Pyridine, 2-methyl-                | C6H7N   | C6H7N   | C6H7N   | 20       |
| Cpd 14: Pyrazine, methyl-                  | 6.583 | Pyrazine, methyl-                  | C5H6N2  | C5H6N2  | C5H6N2  | 20       |
| Cpd 15: 1H-Pyrrole, 2-methyl-              | 7.253 | 1H-Pyrrole, 2-methyl-              | C5H7N   | C5H7N   | C5H7N   | 20       |

|                                         |        |                                 |        |        |        |    |
|-----------------------------------------|--------|---------------------------------|--------|--------|--------|----|
| Cpd 16: Pyridine, 3-methyl-             | 7.924  | Pyridine, 3-methyl-             | C6H7N  | C6H7N  | C6H7N  | 20 |
| Cpd 17: Pyridine, 2-ethyl-              | 9.785  | Pyridine, 2-ethyl-              | C7H9N  | C7H9N  | C7H9N  | 20 |
| Cpd 18: Pyrazine, 2,5-dimethyl-         | 10.033 | Pyrazine, 2,5-dimethyl-         | C6H8N2 | C6H8N2 | C6H8N2 | 20 |
| Cpd 19: 1H-Imidazole, 1-methyl-2-vinyl- | 10.323 | 1H-Imidazole, 1-methyl-2-vinyl- | C6H8N2 | C6H8N2 | C6H8N2 | 20 |
| Cpd 20: 1H-Pyrrole, 2,5-dimethyl-       | 10.818 | 1H-Pyrrole, 2,5-dimethyl-       | C6H9N  | C6H9N  | C6H9N  | 20 |
| Cpd 21: Pyridine, 2,5-dimethyl-         | 10.987 | Pyridine, 2,5-dimethyl-         | C7H9N  | C7H9N  | C7H9N  | 20 |
| Cpd 22: Pyridine, 3,5-dimethyl-         | 11.187 | Pyridine, 3,5-dimethyl-         | C7H9N  | C7H9N  | C7H9N  | 20 |
| Cpd 23: Pyridine, 2,3-dimethyl-         | 11.682 | Pyridine, 2,3-dimethyl-         | C7H9N  | C7H9N  | C7H9N  | 20 |
| Cpd 24: Pyridine, 3-ethyl-              | 12.431 | Pyridine, 3-ethyl-              | C7H9N  | C7H9N  | C7H9N  | 20 |

|                                                                 |        |                                                         |          |          |          |    |
|-----------------------------------------------------------------|--------|---------------------------------------------------------|----------|----------|----------|----|
| Cpd 25: Pyridine, 2,3-dimethyl-                                 | 12.891 | Pyridine, 2,3-dimethyl-                                 | C7H9N    | C7H9N    | C7H9N    | 20 |
| Cpd 26: Silane, chloroethenyldimethyl-                          | 13.005 | Silane, chloroethenyldimethyl-                          | C4H9ClSi | C4H9ClSi | C4H9ClSi | 20 |
| Cpd 27: Pyridine, 4-ethyl-                                      | 13.525 | Pyridine, 4-ethyl-                                      | C7H9N    | C7H9N    | C7H9N    | 20 |
| Cpd 28: Phenol                                                  | 13.918 | Phenol                                                  | C6H6O    | C6H6O    | C6H6O    | 20 |
| Cpd 29: 1,4-Dihydro-4-imino-1-methylaminopyridine               | 14.492 | 1,4-Dihydro-4-imino-1-methylaminopyridine               | C6H9N3   | C6H9N3   | C6H9N3   | 20 |
| Cpd 30: Pyridine, 2-aminomethyl-6-methyl-                       | 14.794 | Pyridine, 2-aminomethyl-6-methyl-                       | C7H10N2  | C7H10N2  | C7H10N2  | 20 |
| Cpd 31: 2-Isopropylpyrazine                                     | 15.048 | 2-Isopropylpyrazine                                     | C7H10N2  | C7H10N2  | C7H10N2  | 20 |
| Cpd 32: 2,3,4-Trimethylpyrrole                                  | 15.978 | 2,3,4-Trimethylpyrrole                                  | C7H11N   | C7H11N   | C7H11N   | 20 |
| Cpd 33: Phenol, 2-methyl-                                       | 17.936 | Phenol, 2-methyl-                                       | C7H8O    | C7H8O    | C7H8O    | 20 |
| Cpd 34: cis-Verbenol                                            | 18.195 | cis-Verbenol                                            | C10H16O  | C10H16O  | C10H16O  | 20 |
| Cpd 35: o-Toluidine                                             | 18.443 | o-Toluidine                                             | C7H9N    | C7H9N    | C7H9N    | 20 |
| Cpd 36: Benzenamine, 3-methyl-                                  | 18.624 | Benzenamine, 3-methyl-                                  | C7H9N    | C7H9N    | C7H9N    | 20 |
| Cpd 37: 9-Oxabicyclo[3.3.1]non-6-en-2-one, oxime                | 18.926 | 9-Oxabicyclo[3.3.1]non-6-en-2-one, oxime                | C8H11NO2 | C8H11NO2 | C8H11NO2 | 20 |
| Cpd 38: Bicyclo[3.1.1]hept-2-en-4-ol, 2,6,6-trimethyl-, acetate | 19.392 | Bicyclo[3.1.1]hept-2-en-4-ol, 2,6,6-trimethyl-, acetate | C12H18O2 | C12H18O2 | C12H18O2 | 20 |

|                                                                        |        |                                                                |          |          |          |    |
|------------------------------------------------------------------------|--------|----------------------------------------------------------------|----------|----------|----------|----|
| Cpd 39: 5H-1-Pyridine, 6,7-dihydro-                                    | 19.476 | 5H-1-Pyridine, 6,7-dihydro-                                    | C8H9N    | C8H9N    | C8H9N    | 20 |
| Cpd 40: 2,4-Heptadienal, 2,4-dimethyl-                                 | 19.875 | 2,4-Heptadienal, 2,4-dimethyl-                                 | C9H14O   | C9H14O   | C9H14O   | 20 |
| Cpd 41: 2,4-Heptadienal, 2,4-dimethyl-                                 | 19.996 | 2,4-Heptadienal, 2,4-dimethyl-                                 | C9H14O   | C9H14O   | C9H14O   | 20 |
| Cpd 42: Tricyclo[4.2.2.0(1,5)]decane-7-ol                              | 20.322 | Tricyclo[4.2.2.0(1,5)]decane-7-ol                              | C10H16O  | C10H16O  | C10H16O  | 20 |
| Cpd 43: Cyclopentaneacetaldehyde, 2-formyl-3-methyl-.alpha.-methylene- | 20.515 | Cyclopentaneacetaldehyde, 2-formyl-3-methyl-.alpha.-methylene- | C10H14O2 | C10H14O2 | C10H14O2 | 20 |
| Cpd 44: 2,4-Heptadienal, 2,4-dimethyl-                                 | 20.648 | 2,4-Heptadienal, 2,4-dimethyl-                                 | C9H14O   | C9H14O   | C9H14O   | 20 |
| Cpd 45: Cyclopentaneacetaldehyde, 2-formyl-3-methyl-.alpha.-methylene- | 20.775 | Cyclopentaneacetaldehyde, 2-formyl-3-methyl-.alpha.-methylene- | C10H14O2 | C10H14O2 | C10H14O2 | 20 |
| Cpd 46: Benzeneacetic acid, 4-(1H-1,2,3,4-tetrazol-1-yl)-              | 20.848 | Benzeneacetic acid, 4-(1H-1,2,3,4-tetrazol-1-yl)-              | C9H8N4O2 | C9H8N4O2 | C9H8N4O2 | 20 |
| Cpd 47: Bicyclo[2.2.1]heptan-2-ol, 7,7-dimethyl-, acetate              | 20.975 | Bicyclo[2.2.1]heptan-2-ol, 7,7-dimethyl-, acetate              | C11H18O2 | C11H18O2 | C11H18O2 | 20 |
| Cpd 48: 2,6-Difluoroaniline                                            | 21.416 | 2,6-Difluoroaniline                                            | C6H5F2N  | C6H5F2N  | C6H5F2N  | 20 |
| Cpd 49: cis,trans-5,9-Cyclododecadiene-cis-1,2-diol                    | 21.682 | cis,trans-5,9-Cyclododecadiene-cis-1,2-diol                    | C12H20O2 | C12H20O2 | C12H20O2 | 20 |

|                                                     |        |                                             |          |          |          |    |
|-----------------------------------------------------|--------|---------------------------------------------|----------|----------|----------|----|
| Cpd 50: cis,trans-5,9-Cyclododecadiene-cis-1,2-diol | 21.953 | cis,trans-5,9-Cyclododecadiene-cis-1,2-diol | C12H20O2 | C12H20O2 | C12H20O2 | 20 |
| Cpd 51: 1H-Indene, 1-hexadecyl-2,3-dihydro-         | 22.02  | 1H-Indene, 1-hexadecyl-2,3-dihydro-         | C25H42   | C25H42   | C25H42   | 20 |
| Cpd 52: 2,5-Octadecadiynoic acid, methyl ester      | 22.219 | 2,5-Octadecadiynoic acid, methyl ester      | C19H30O2 | C19H30O2 | C19H30O2 | 20 |
| Cpd 53: Quinoline, 6-methyl-                        | 22.582 | Quinoline, 6-methyl-                        | C10H9N   | C10H9N   | C10H9N   | 20 |
| Cpd 54: 2,5-Octadecadiynoic acid, methyl ester      | 22.63  | 2,5-Octadecadiynoic acid, methyl ester      | C19H30O2 | C19H30O2 | C19H30O2 | 20 |

|                                                                                            |        |                                                                                    |             |             |             |    |
|--------------------------------------------------------------------------------------------|--------|------------------------------------------------------------------------------------|-------------|-------------|-------------|----|
| Cpd 55: 2-(4-Hydroxy-4-methyl-tetrahydro-pyran-3-ylamino)-3-(1H-indol-2-yl)-propionic acid | 22.848 | 2-(4-Hydroxy-4-methyl-tetrahydro-pyran-3-ylamino)-3-(1H-indol-2-yl)-propionic acid | C17H22N2O4  | C17H22N2O4  | C17H22N2O4  | 20 |
| Cpd 56: Paromomycin                                                                        | 23.138 | Paromomycin                                                                        | C23H45N5O14 | C23H45N5O14 | C23H45N5O14 | 20 |
| Cpd 57: Paromomycin                                                                        | 23.252 | Paromomycin                                                                        | C23H45N5O14 | C23H45N5O14 | C23H45N5O14 | 20 |
| Cpd 58: Paromomycin                                                                        | 23.349 | Paromomycin                                                                        | C23H45N5O14 | C23H45N5O14 | C23H45N5O14 | 20 |
| Cpd 59: Acetamide, N-methyl-N-[4-(3-hydroxypyrrrolidinyl)-2-butynyl]-                      | 23.681 | Acetamide, N-methyl-N-[4-(3-hydroxypyrrrolidinyl)-2-butynyl]-                      | C11H18N2O2  | C11H18N2O2  | C11H18N2O2  | 20 |
| Cpd 60: Acetamide, N-methyl-N-[4-(3-hydroxypyrrrolidinyl)-2-butynyl]-                      | 24.062 | Acetamide, N-methyl-N-[4-(3-hydroxypyrrrolidinyl)-2-butynyl]-                      | C11H18N2O2  | C11H18N2O2  | C11H18N2O2  | 20 |
| Cpd 61: Acetamide, N-methyl-N-[4-(3-hydroxypyrrrolidinyl)-2-butynyl]-                      | 24.231 | Acetamide, N-methyl-N-[4-(3-hydroxypyrrrolidinyl)-2-butynyl]-                      | C11H18N2O2  | C11H18N2O2  | C11H18N2O2  | 20 |
| Cpd 62: Acetamide, N-methyl-N-[4-(3-hydroxypyrrrolidinyl)-2-butynyl]-                      | 24.31  | Acetamide, N-methyl-N-[4-(3-hydroxypyrrrolidinyl)-2-butynyl]-                      | C11H18N2O2  | C11H18N2O2  | C11H18N2O2  | 20 |

|                                                                                                         |        |                                                                                                 |            |            |            |    |
|---------------------------------------------------------------------------------------------------------|--------|-------------------------------------------------------------------------------------------------|------------|------------|------------|----|
| Cpd 63: Acetamide, N-methyl-N-[4-(3-hydroxypyrrrolidinyl)-2-butynyl]-                                   | 24.419 | Acetamide, N-methyl-N-[4-(3-hydroxypyrrrolidinyl)-2-butynyl]-                                   | C11H18N2O2 | C11H18N2O2 | C11H18N2O2 | 20 |
| Cpd 64: Acetamide, N-methyl-N-[4-(3-hydroxypyrrrolidinyl)-2-butynyl]-                                   | 24.515 | Acetamide, N-methyl-N-[4-(3-hydroxypyrrrolidinyl)-2-butynyl]-                                   | C11H18N2O2 | C11H18N2O2 | C11H18N2O2 | 20 |
| Cpd 65: 1-Hydroxycyclododecanecarbonitrile                                                              | 24.666 | 1-Hydroxycyclododecanecarbonitrile                                                              | C13H23NO   | C13H23NO   | C13H23NO   | 20 |
| Cpd 66: 2-[4-methyl-6-(2,6,6-trimethylcyclohex-1-enyl)hexa-1,3,5-trienyl]cyclohex-1-en-1-carboxaldehyde | 25.548 | 2-[4-methyl-6-(2,6,6-trimethylcyclohex-1-enyl)hexa-1,3,5-trienyl]cyclohex-1-en-1-carboxaldehyde | C23H32O    | C23H32O    | C23H32O    | 20 |
| Cpd 67: 2-[4-methyl-6-(2,6,6-trimethylcyclohex-1-enyl)hexa-1,3,5-trienyl]cyclohex-1-en-1-carboxaldehyde | 27.349 | 2-[4-methyl-6-(2,6,6-trimethylcyclohex-1-enyl)hexa-1,3,5-trienyl]cyclohex-1-en-1-carboxaldehyde | C23H32O    | C23H32O    | C23H32O    | 20 |

Reaction conditions: reaction temperature, 520 °C; molar ratio of NH<sub>3</sub> to glycerol, 8:1; GHSV, 3200 h<sup>-1</sup>; glycerol concentration, 20%.
